# Supplementary material for: Zirconium carbide, hafnium carbide and their ternary carbide nanoparticles by an in situ polymerization route
Source: Royal Society of Chemistry journal article supplement (doi:10.1039/c4ra14996c), 2015-01-01
Supplement: c4ra14996c1.pdf [file c4ra14996c1.pdf]

Electronic supplementary information (ESI) for

**Zirconium, Hafnium and Their Ternary Carbide  
Nanoparticles by an in-situ Polymerization Route**

Chunlei Yan, Rongjun Liu\*, Changrui Zhang, and Yingbin Cao

*Science and Technology on Advanced Ceramic Fibers and Composites Laboratory, National  
University of Defense Technology, Changsha 410073, China*

*\*Corresponding author: Rongjun Liu, Tel: +86-731-84573169, fax: +86-731-84576578, E-mail:*

*rongjunliu@nudt.edu.cn.*

**Characterization Techniques.** *FT-IR Spectroscopy.* The fourier transform infrared (FT-IR) spectra of the samples were recorded on an Avatar 360 spectrometer (Nicolet) in the 4000–400  $\text{cm}^{-1}$  frequency range with a resolution of 4  $\text{cm}^{-1}$ , using KBr pellets.

*$^{13}\text{C}$  NMR Spectroscopy.* Liquid-state  $^{13}\text{C}$  nuclear magnetic resonance ( $^{13}\text{C}$ -NMR) data was collected with a Bruker Avance-400MHz spectrometer. Solid-state  $^{13}\text{C}$  NMR spectra were recorded on a Bruker Avance III 400 NMR spectrometer operating at 100.6 MHz using a cross-polarization magic angle spinning (CP-MAS) technique.

*Thermal Analysis.* Thermal behavior of the metal carbide precursor was studied by differential scanning calorimetry and thermal gravimetric analysis (DSC-TG; Netzsch STA 449F3).

*X-ray Diffraction.* Powder X-ray diffraction patterns were performed on a D8 Diffractometer from Bruker instruments (Cu  $\text{K}\alpha$  radiation,  $\lambda=0.154$  nm) equipped with a scintillation counter.

*Microstructural Characterization:* Morphology of the powder samples was observed by a scanning electron microscope (SEM; HITACHI S-4800).

*Particle size distribution.* Particle size distribution was performed on LS900 (Zhuhai OMEC Instrument Co., Ltd., China) laser particle size analyzer.

*Specific Surface Area.* Specific surface area of solids prepared was determined by nitrogen sorption experiments with a Quantachrome Autosorb-1 at liquid nitrogen temperature, and data analysis was performed by

Quantachrome software.

*Transmission Electron Microscopy.* TEM and HRTEM images were taken on a Tecnai F20 microscope operating at 200 kV.

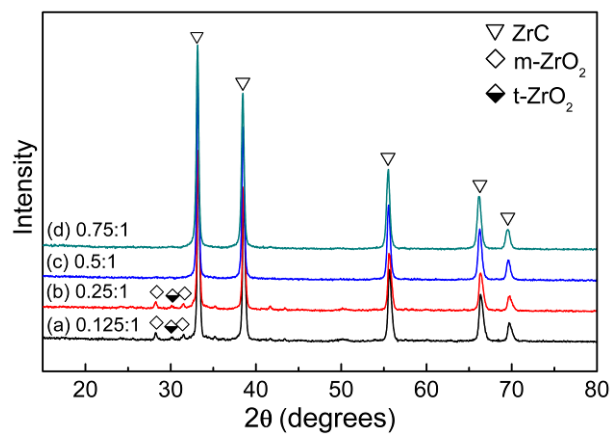

**Figure S1.** XRD patterns of ZrC precursor (EG/metal molar ratio was set to 1) with CA/metal molar ratios of (a) 0.125:1, (b) 0.25:1, (c) 0.5:1 and (d) 0.75:1 pyrolysed at 1400 °C.

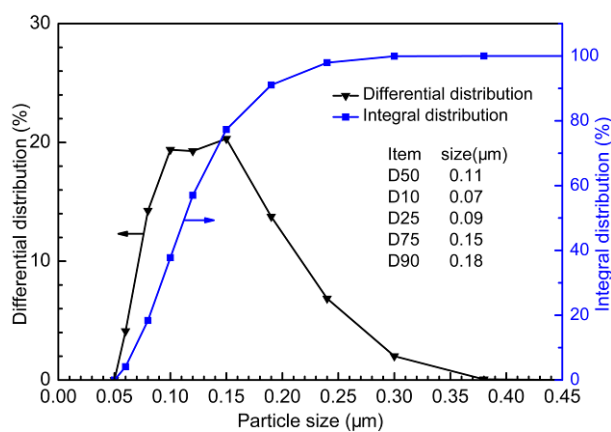

**Figure S2.** Particle size distributions for ZrC particles obtained at 1300 °C.
